# Supplementary material for: DMBA acts on cumulus cells to desynchronize nuclear and cytoplasmic maturation of pig oocytes
Source: PubMed Central journal article supplement (PMC5431913; doi:10.1038/s41598-017-01870-6), 2017-05-10

# DMBA acts on cumulus cells to desynchronize nuclear and cytoplasmic maturation of pig oocytes

Zhi-Qiang Song<sup>1</sup>, Xuan Li<sup>1</sup>, Yan-Kui Wang<sup>1</sup>, Zhi-Qiang Du<sup>1,2\*</sup>, Cai-Xia Yang<sup>1,2\*</sup>

## Supplementary information

**Supplementary Table S1: The information of DMBA concentration used in vitro in previous reports.**

| Level of material | Species and material type  | DMBA concentration     | Culture/treatment time | Reference                                 | Note                           |
|-------------------|----------------------------|------------------------|------------------------|-------------------------------------------|--------------------------------|
|                   | Human granulosa cell       | 5 $\mu$ M              | 12h                    | Bengtsson et al., 1988                    | +HCG                           |
|                   | Human T cell               | 1,3, 10, 30 $\mu$ M    | 100sec                 | Archuleta et al., 1993                    | +10% FBS                       |
| Somatic cell      | Mice thymus cell           | 3,10,30 $\mu$ M        | 4h                     | Burchiel et al., 1992                     | +10% FBS                       |
|                   | Mice langerhans cell       | 32 $\mu$ M, 64 $\mu$ M | 24h                    | Modi et al., 2012                         | +10% FBS                       |
|                   | Pig ovarian granulosa cell | 5 $\mu$ M              | 48h                    | Becedas et al., 1993                      | +10% FCS                       |
|                   | Mice ovary                 | 50nM                   | 4days                  | Sobinoff et al., 2011                     | +5% FCS                        |
| Ovary             | Mice ovary                 | 1 $\mu$ M              | 72h,6days              | Matikainen et al., 2001                   | +3mg/ml BSA                    |
|                   | Neonatal rat ovary         | 12.5nM,75nM            | 1,2,4,8days            | Madden et al., 2014                       | +1mg/ml BSA<br>+1mg/ml Albumax |
|                   | Mytilus sperm              | 0,5,10,15,20 $\mu$ M   | 10min                  | Togo and Morisawa, 2004                   | Seawater only                  |
| Germ cell         | Ascidian oocyte            | 10, 20 $\mu$ M         | 1h                     | Lambert., 2005, 2011; Robert et al., 1999 | Seawater only                  |
|                   | Pig COC                    | 0.01,0.1,1,10 $\mu$ M  | 24h                    | Su et al., 1999                           | +hypoxanthine - hormones       |

### Abbreviation in Supplementary Table S1

COC:cumulus -oocyte complexe; HCG:human chorionic gonadotropin; FCS:fetal calf serum; FBS:fetal bovine serum; BSA: bovine serum albumin.

### References (cited in Supplementary Table S1)

1. Bengtsson, M., Hamberger, L. & Rydström, J. Metabolism of 7,12-dimethylbenz(a)anthracene by different types of cells in the human ovary. *Xenobiotica*. **18**, 1255-1270 (1988).
2. Archuleta, M. M., Schieven, G. L., Ledbetter, J. A., Deanin, G. G. & Burchiel, S. W. 7,12-Dimethylbenz[a]anthracene activates protein-tyrosine kinases Fyn and Lck in the HPB-ALL human T-cell line and increases tyrosine phosphorylation of phospholipase C-gamma 1, formation of inositol 1,4,5-trisphosphate, and mobilization of intracellular calcium. *Proc Natl Acad Sci USA*. **90**, 6105-6109 (1993).
3. Burchiel, S. W. et al. DMBA-induced cytotoxicity in lymphoid and nonlymphoid organs of B6C3F1 mice: relation of cell death to target cell intracellular calcium and DNA damage. *Toxicol Appl Pharmacol*. **113**, 126-132 (1992).
4. Modi, B. G. et al. Langerhans cells facilitate epithelial DNA damage and squamous cell carcinoma. *Science*. **335**, 104-108 (2012).
5. Becedas, L. et al. Metabolism of polycyclic aromatic hydrocarbons to mutagenic species by rat and porcine ovarian granulosa cells: detection by cocultivation with V79 Chinese hamster cells. *Reprod Toxicol*. **7**, 219-224 (1993).
6. Sobinoff, A. P., Mahony, M., Nixon, B., Roman, S. D. & McLaughlin, E. A. Understanding the Villain: DMBA-induced preantral ovotoxicity involves selective follicular destruction and primordial follicle activation through PI3K/Akt and mTOR signaling. *Toxicol Sci*. **123**, 563-575 (2011).
7. Matikainen, T. et al. Aromatic hydrocarbon receptor-driven Bax gene expression is required for premature ovarian failure caused by biohazardous environmental chemicals. *Nat Genet*. **28**, 355-360 (2001).
8. Madden, J. A., Hoyer, P. B., Devine, P. J & Keating, A. F. Acute 7,12-dimethylbenz[a]anthracene exposure causes differential concentration-dependent follicle depletion and gene expression in neonatal rat ovaries. *Toxicol Appl Pharmacol*. **76**, 179-187 (2014).
9. Togo, T. & Morisawa, M. GPI-anchored aminopeptidase is involved in the acrosome reaction in sperm of the mussel *mytilusedulis*. *Mol Reprod Dev*. **67**, 465-471 (2004).
10. Lambert CC. Signaling pathways in ascidian oocyte maturation: the roles of cAMP/Epac, intracellular calcium levels, and calmodulin kinase in regulating GVBD. *Mol Reprod Dev*. **78**, 726-733 (2011).
11. Lambert, C. C. Signaling pathways in ascidian oocyte maturation: effects of various inhibitors and activators on germinal vesicle breakdown. *Dev Growth Differ*. **47**, 265-272 (2005).
12. Robert, L. K., Lucio-Gough, L. M., Goode, C. A., Mckinney, K. & Lambert, C. C. Activation of follicle cell surface phospholipase by tyrosine kinase dependent pathway is an essential event in Ascidian fertilization. *Mol Reprod Dev*. **54**, 69-75 (1999).

13. Su, Y. Q., Xia, G. L., Byskov, A. G., Fu, G. D. & Yang, C. R. Protein kinase C and intracellular calcium are involved in follicle-stimulating hormone-mediated meiotic resumption of cumulus cell-enclosed porcine oocytes in hypoxanthine-supplemented medium. *Mol Reprod Dev.* **53**, 51-58 (1999).

**Supplementary Table S2: Comparison of composition of culture medium used in our present study and referred report.**

| Composition of culture medium | Su et al. 1999 <sup>1</sup> | In the present study |
|-------------------------------|-----------------------------|----------------------|
| Basic medium 199              | With                        | With                 |
| Pyruvate                      | 0.23mM                      | -                    |
| Glutamin                      | 2mM                         | -                    |
| Bovine serum albumin          | 3mg/ml                      | -                    |
| Penicillin                    | 100IU/ml                    | -                    |
| Streptomycin                  | 100IU/ml                    | -                    |
| Hypoxanthine                  | 4mM                         | -                    |
| Sodium pyruvate               | -                           | 0.91mM               |
| Polyvinyl Alcohol             | -                           | 1mg/ml               |
| D-glucose                     | -                           | 3.05 mM              |
| Gentamincin                   | -                           | 1µg/ml               |
| L-cysteine                    | -                           | 0.57mM               |
| Follicle stimulating hormone  | -                           | 0.5µg/ml             |
| Luteinizing hormone           | -                           | 0.5µg/ml             |
| Epidermal growth factor       | -                           | 10µg/ml              |

1. Su, Y. Q., Xia, G. L., Byskov, A. G., Fu, G. D. & Yang, C. R. Protein kinase C and intracellular calcium are involved in follicle-stimulating hormone-mediated meiotic resumption of cumulus cell-enclosed porcine oocytes in hypoxanthine-supplemented medium. *Mol Reprod Dev.* **53**, 51-58 (1999).

**Supplementary Table S3: Primers used for real-time PCR.**

| Genes    | Gene Bank accession No. | Primer sequence (5'-3')                                  | Tm (°C) | Product size (bp) |
|----------|-------------------------|----------------------------------------------------------|---------|-------------------|
| Kdm6a    | XM_003360275.3          | F: GCAGGCTCAGTTGTGTAACC<br>R: GGTTTACATGCCTGCTGTGC       | 60      | 150               |
| Setd2    | XM_005669478.1          | F: TAGCTCGCAAGCTGACTCAT<br>R: ACAGCCCCAAACTTCTGCAT       | 60      | 139               |
| Ezh2     | NM_001244309.1          | F: TGCAACACCCAATACTTACAAGC<br>R: ACTCTTTTGCTCCCTCCAAGT   | 60      | 101               |
| G9a      | NM_001101823.1          | F: GGAGGAGCTGGGGTTTGAC<br>R: CAGAGGTGGCTGCTGAGTTG        | 60      | 254               |
| Eed      | XM_013979231.1          | F: TGTGACTATTCTTGGGCGATTT<br>R: TGGCTTTATGAGGATCTTCTACTT | 60      | 153               |
| Suz12    | XM_013981159.1          | F: TCAGGATATTCATCGCCAACC<br>R: CTTCGGATTCAAGAAATTCAGACA  | 60      | 134               |
| Ywhag    | XM_003124396.4          | F: GGCCATGAAGAACGTGACAG<br>R: CATCCTGACATACGGCCTCC       | 60      | 224               |
| Caspase3 | XM_005671704            | F: TTTGCGTGCTTCTAAGCCAT<br>R: GGCAGGCCTGAATTATGAAA       | 60      | 147               |
| Bcl2     | AF216205                | F: CGTCCCAGCTCCACATCACC<br>R: AGTGCCCCACCGAAGGAGAA       | 60      | 130               |
| Bax      | XM_003127290.4          | F: GCCGAAATGTTTGCTGACG<br>R: GCAGCCGATCTCGAAGGA          | 60      | 157               |

## Supplementary Figures

### **Supplementary Figure S1: Effects of DMBA exposure on cumulus expansion of**

**COCs.** COCs were photographed using digital camera and the ratio of cumulus cell expansion was calculated according to the previously described method (Li et al., 2016). **(a)** Representative images of COCs taken at 0, 24 and 44h. Scale bar, 500 $\mu$ m.

**(b)** The extent of the relative cumulus expansion of COCs presented as a ratio of the total two-dimensional area of each COCs at different time points to the original size of COCs at 0h. \*\*\* indicate significant differences at  $P < 0.001$  level between groups.

### **Supplementary Figure S2: The effect of CBX on PB1 rate of porcine CDOs.**

PB1 rate of CDOs was not affected by 50 $\mu$ M CBX incubation for 44h.

### **Supplementary Figure S3: Full-length blot to detect p-ERK1/2, $\gamma$ H2A.X and**

**$\beta$ -tubulin proteins.** Lysate from three replicates of control and 20 $\mu$ M treated pig oocytes (see Methods for details) was run on the same gel and protein was transferred onto membrane. The membrane was cut in two parts containing the proteins above and below the 25 kDa marker. The upper part of the membrane was used to detect p-ERK1/2 (phospho T202/Y204) and the lower part was used to detect  $\gamma$ H2A.X (phospho S139). After p-ERK1/2 detection, the upper part of the membrane was re-probed with anti- $\beta$ -tubulin antibody.

### **Supplementary Figure S4: Distribution of nuclear stages of porcine oocytes from**

**COCs treated by DMBA during IVM.** **(a)** Representative images of porcine oocytes at different nuclear stages during IVM. Scale bar, 100 $\mu$ m. **(b-h)** Nuclear stages of porcine oocytes from COCs collected at 12h, 18h, 24h, 30h, 36h, 44, 72h, respectively.

\* indicates the significant difference at 0.05 level. \* indicates significant differences at

P < 0.05 level between groups.

**Supplementary Figure S5: Analysis of 1-cell arrested parthenotes from different**

**groups.** (a) Developmentally arrested 1-cell embryos were stained with Hoechst33342 to show different numbers of pro-nuclei, from 1 to 6. Scale bar, 100 $\mu$ m.

(b) Graph to show the rate of 1-cell arrested parthenotes in control and 20 $\mu$ M DMBA treated COC and CDO groups. (c) Graph to show the rate of 1-cell arrested parthenotes with different number of pronuclei. \*\*\* indicate significant differences at

P < 0.001 level between groups.

Supplementary Figure S1

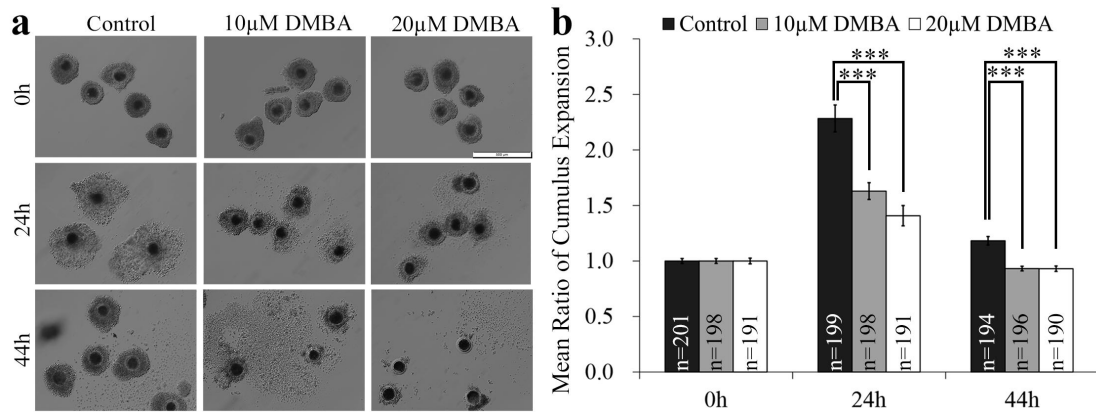

Supplementary Figure S2

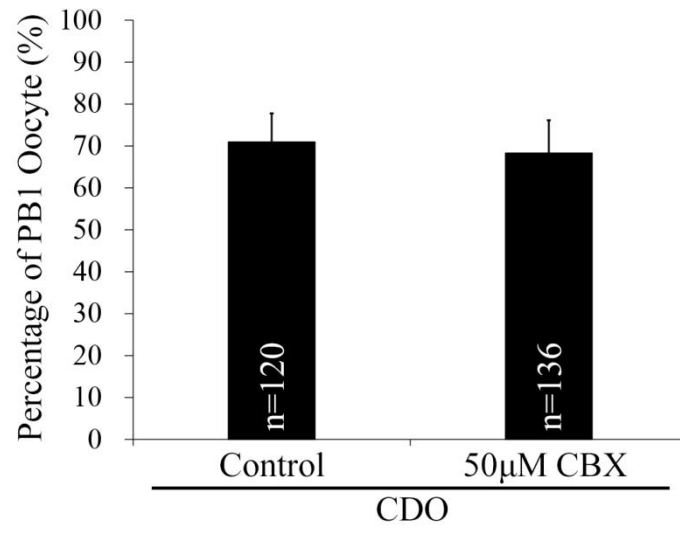



### Supplementary Figure S3

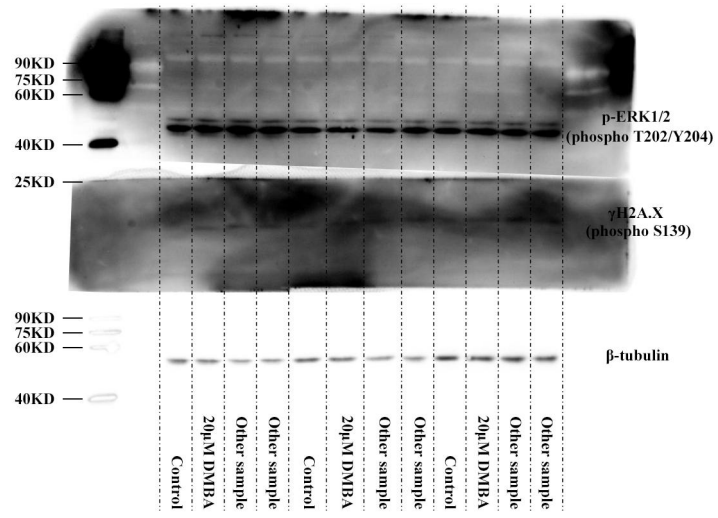

## Supplementary Figure S4

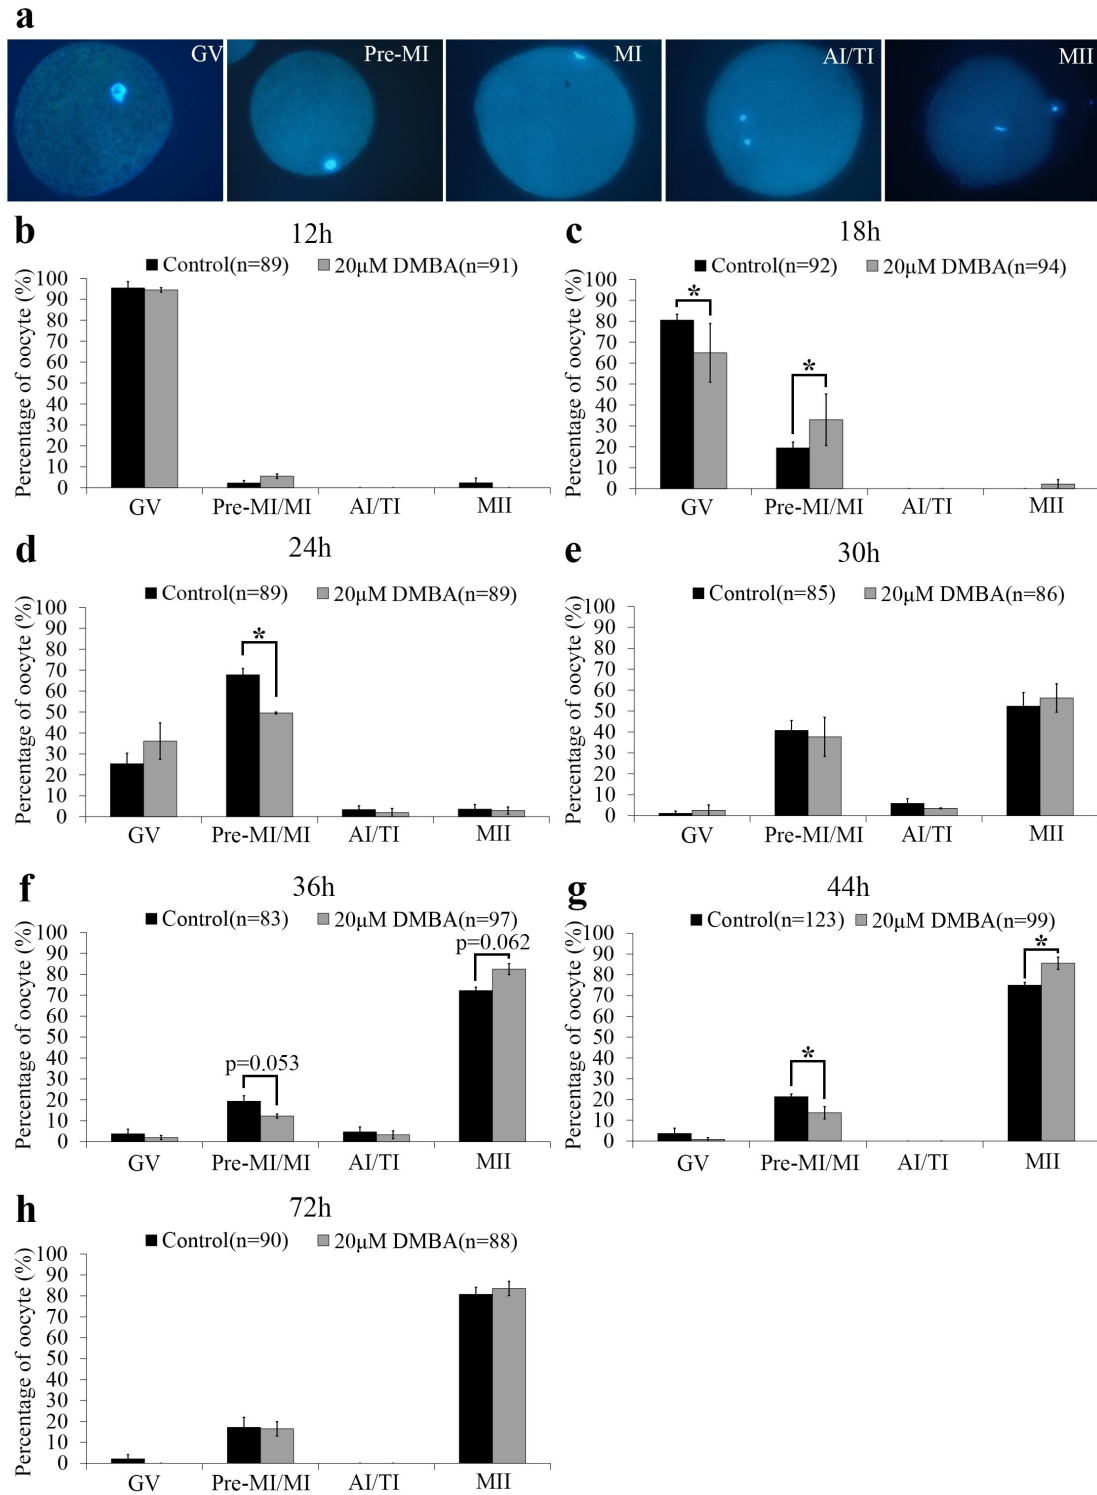

### Supplementary Figure S5

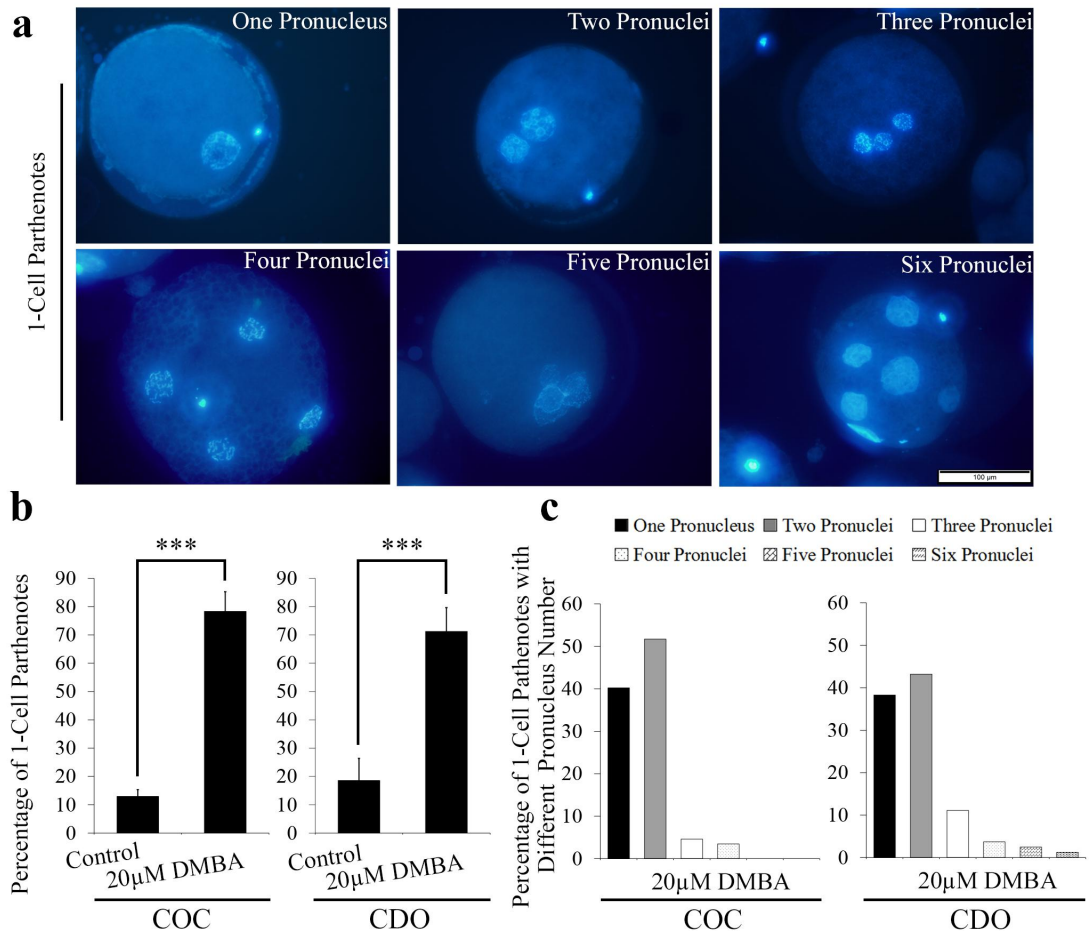

Supplement: 41598_2017_1870_MOESM1_ESM.pdf [file 41598_2017_1870_MOESM1_ESM.pdf]
